# Supplementary material
Source: PubMed Central journal article supplement (PMC2667754)
Supplement: M900021200_1.pdf [file M900021200_1.pdf]

**COMBINED X-RAY AND NMR ANALYSIS OF THE STABILITY OF THE CYCLOTIDE  
CYSTINE KNOT FOLD THAT UNDERPINS ITS INSECTICIDAL ACTIVITY AND  
POTENTIAL USE AS DRUG SCAFFOLD**

**Conan K. Wang<sup>1</sup>, Shu-Hong Hu<sup>1</sup>, Jennifer L. Martin<sup>1</sup>, Tove Sjögren<sup>2</sup>, Janos Hajdu<sup>2</sup>, Lars Bohlin<sup>3</sup>, Per Claeson<sup>3</sup>, Ulf Göransson<sup>3</sup>, K. Johan Rosengren<sup>1,2</sup>, Jun Tang<sup>4</sup>, Nin-hua Tan<sup>4</sup>, and David J. Craik<sup>1</sup>**

From The University of Queensland<sup>1</sup>, Institute for Molecular Bioscience, Brisbane, Queensland, 4072, Australia,  
Molecular Biophysics<sup>2</sup>, Department of Cellular and Molecular Biology, Biomedical Centre, Uppsala University, P.O. Box 596, SE-75124 Uppsala, Sweden,  
Pharmacognosy<sup>3</sup>, Department of Medicinal Chemistry, Biomedical Centre, Uppsala University, P.O. Box 574, SE-75123 Uppsala, Sweden, and  
Kunming Institute of Botany<sup>4</sup>, Chinese Academy of Sciences, Kunming 650204, Yunnan, China  
Running head: cyclotide structure and stability

Address correspondence to: David J. Craik, Institute for Molecular Bioscience, University of Queensland, Brisbane, Qld, 4072, Australia. Tel: 61-7-3346 2019. Fax: 61-7-3346 2029. E-mail: d.craik@imb.uq.edu.au

## **Supplemental Data**

### **Table of Contents**

|                                                                                          | <b>page</b> |
|------------------------------------------------------------------------------------------|-------------|
| <u>Table S1.</u> Hydrogen Bond Interactions with Water Molecules in varv F               | S2          |
| <u>Fig. S1.</u> TOCSY and NOESY spectra of varv F                                        | S3          |
| <u>Fig. S2.</u> Amino acid composition of cyclotide sequences and sequences from the PDB | S4          |

Table S1. Hydrogen Bond Interactions with Water Molecules in varv F

| residue |    |                | WAT <sup>a</sup> | distance (Å) | temperature factor | residue |    |              | WAT <sup>a</sup> | distance (Å) | temperature factor |
|---------|----|----------------|------------------|--------------|--------------------|---------|----|--------------|------------------|--------------|--------------------|
| CYS     | 1  | N              | 49               | 2.81         | 23.13              | TYR     | 11 | OH           | 59               | 2.75         | 53.20              |
| CYS     | 1  | O              | 39               | 3.17         | 36.31              | THR     | 12 | O            | 38               | 2.79         | 25.76              |
| CYS     | 1  | N              | 43               | 3.42         | 36.33              | THR     | 12 | O $\gamma$ 1 | 39               | 2.67         | 36.31              |
| GLY     | 2  | N              | 49               | 2.89         | 23.13              | ALA     | 13 | N            | 41               | 3.11         | 30.25              |
| GLY     | 2  | N              | 43               | 2.74         | 36.33              | GLY     | 14 | O            | 34               | 2.72         | 22.98              |
| GLY     | 2  | O              | 69               | 2.63         | 39.47              | GLY     | 14 | N            | 55               | 2.97         | 42.83              |
| GLU     | 3  | N              | 49               | 3.46         | 23.13              | CYS     | 15 | O            | 38               | 3.35         | 25.76              |
| GLU     | 3  | O $\epsilon$ 1 | 35               | 2.95         | 28.42              | CYS     | 15 | O            | 71               | 2.91         | 44.86              |
| THR     | 4  | O              | 32               | 3.32         | 18.64              | CYS     | 15 | O            | 65               | 2.67         | 51.00              |
| THR     | 4  | O $\gamma$ 1   | 32               | 2.72         | 18.64              | SER     | 16 | N            | 34               | 3.35         | 22.98              |
| THR     | 4  | O              | 35               | 2.98         | 28.42              | SER     | 16 | O $\gamma$   | 34               | 2.84         | 22.98              |
| THR     | 4  | O $\gamma$ 1   | 54               | 2.60         | 39.52              | SER     | 16 | O            | 61               | 3.39         | 34.96              |
| THR     | 6  | N              | 32               | 3.08         | 18.64              | CYS     | 17 | N            | 30               | 3.30         | 5.44               |
| THR     | 6  | O $\gamma$ 1   | 32               | 2.83         | 18.64              | CYS     | 17 | O            | 47               | 2.70         | 34.20              |
| LEU     | 7  | O              | 37               | 2.64         | 29.94              | SER     | 18 | O $\gamma$   | 61               | 2.74         | 34.96              |
| LEU     | 7  | N              | 52               | 3.14         | 32.44              | SER     | 18 | O $\gamma$   | 62               | 2.69         | 44.46              |
| GLY     | 8  | O              | 51               | 2.75         | 39.76              | TRP     | 19 | O            | 42               | 2.65         | 27.88              |
| GLY     | 8  | O              | 48               | 3.45         | 41.24              | TRP     | 19 | O            | 68               | 3.40         | 35.93              |
| GLY     | 8  | O              | 74               | 3.14         | 43.54              | CYS     | 22 | O            | 49               | 2.70         | 23.13              |
| THR     | 9  | O              | 35               | 3.24         | 28.42              | THR     | 23 | O            | 31               | 3.41         | 16.83              |
| THR     | 9  | O $\gamma$ 1   | 37               | 2.66         | 29.94              | THR     | 23 | O $\gamma$ 1 | 31               | 3.02         | 16.83              |
| THR     | 9  | O              | 52               | 3.26         | 32.44              | THR     | 23 | O            | 34               | 3.22         | 22.98              |
| THR     | 9  | O $\gamma$ 1   | 45               | 3.42         | 38.35              | THR     | 23 | O $\gamma$ 1 | 61               | 3.09         | 34.96              |
| THR     | 9  | O $\gamma$ 1   | 48               | 2.84         | 41.24              | THR     | 23 | O $\gamma$ 1 | 62               | 3.33         | 44.46              |
| CYS     | 10 | N              | 30               | 3.29         | 5.44               | ASN     | 25 | N            | 46               | 2.90         | 36.67              |
| CYS     | 10 | O              | 38               | 3.07         | 25.76              | ASN     | 25 | O $\delta$ 1 | 46               | 3.49         | 36.67              |
| CYS     | 10 | O              | 44               | 2.81         | 29.39              | GLY     | 26 | N            | 31               | 3.13         | 16.83              |
| CYS     | 10 | O              | 71               | 3.05         | 44.86              | GLY     | 26 | O            | 33               | 2.81         | 33.46              |
| TYR     | 11 | OH             | 40               | 3.14         | 28.64              | PRO     | 28 | O            | 43               | 2.90         | 36.33              |
| TYR     | 11 | O              | 53               | 2.78         | 44.43              | ILE     | 29 | O            | 50               | 3.13         | 35.76              |

<sup>a</sup>Water molecules

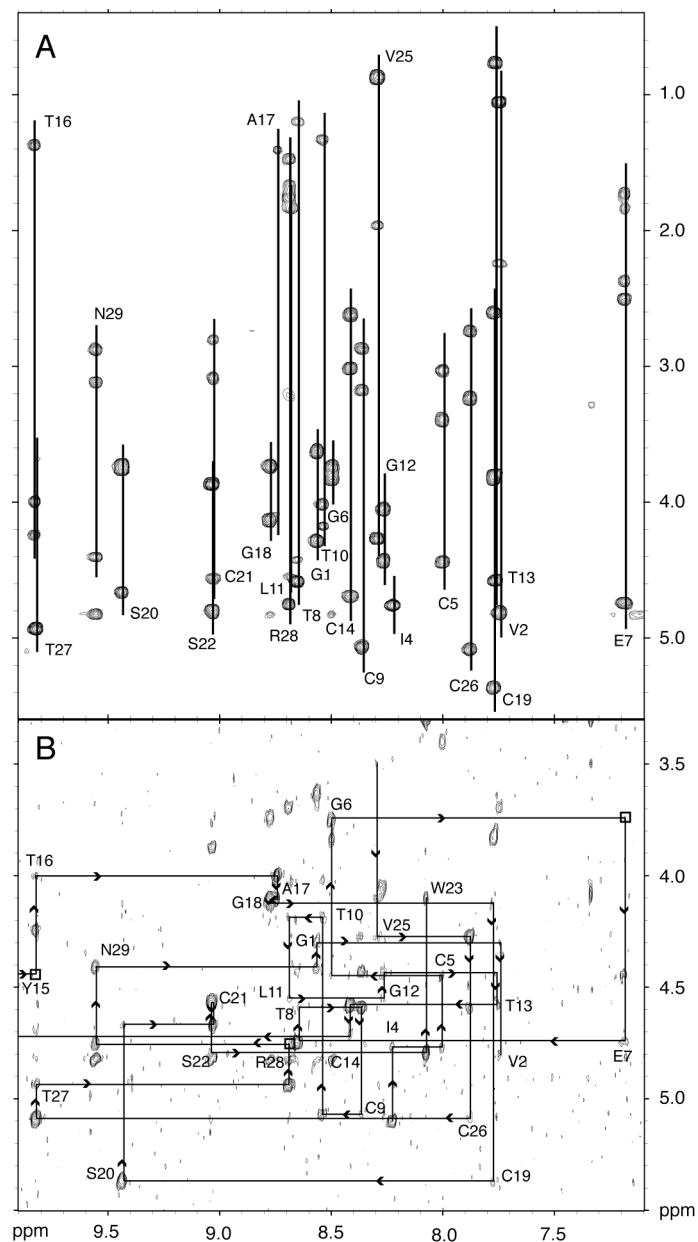

**Fig. S1.** TOCSY and NOESY spectra of varv F. Fingerprint regions of a 80 ms TOCSY spectrum (A) and a 200 ms NOESY spectrum in 90% H<sub>2</sub>O and 10% D<sub>2</sub>O at 298K. Spin systems are shown in the TOCSY spectrum and the sequential connectivities in the NOESY spectrum. The one-letter code for amino acids as well as the residue number is used for the sequence assignments. Tyr-15 has a NH chemical shift of 11.61 ppm and is not included in the diagram to improve visibility of the other peaks. Some peaks that are only visible at lower threshold levels are indicated by boxes.

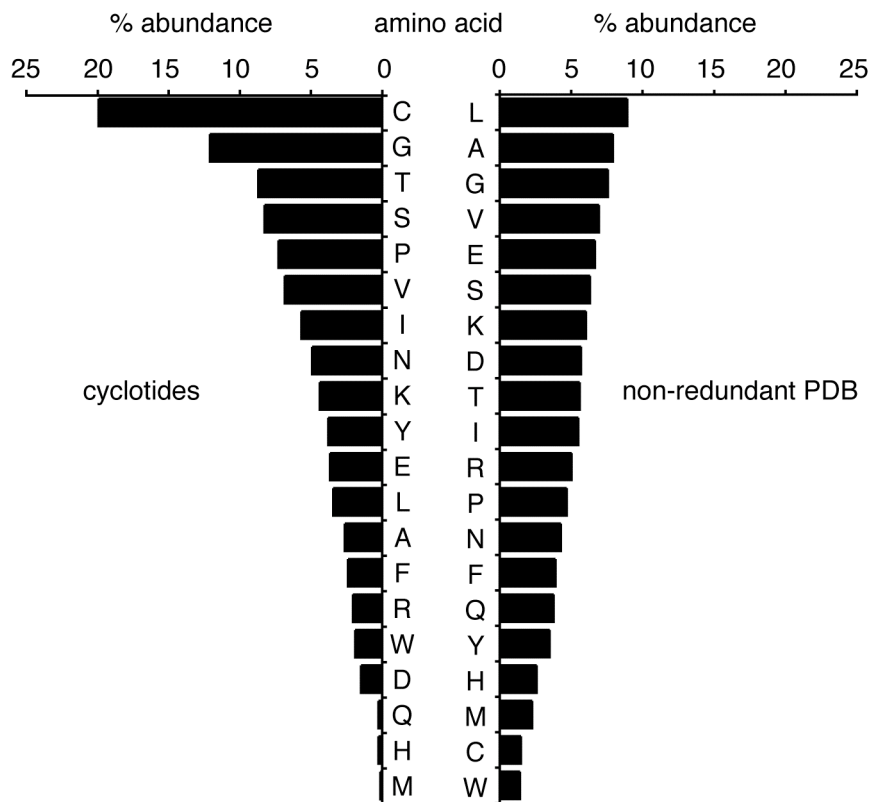

**Fig. S2.** Amino acid composition of cyclotide sequences and sequences from the PDB. Amino acid compositions were calculated for cyclotides (extracted from CyBase; <http://research1t.imb.uq.edu.au/cybase>) and are shown on the left of the figure. Amino acid compositions for a non-redundant compilation of the PDB (from PISCES; <http://dunbrack.fccc.edu/Guoli/PISCES.php>) are shown on the right of the figure.
